# Supplementary material
Source: Springer Nature journal article supplement (https://www.springermedizin.de/resource/supplementary/12939_2010_210_MOESM6_ESM.pdf/9550606)

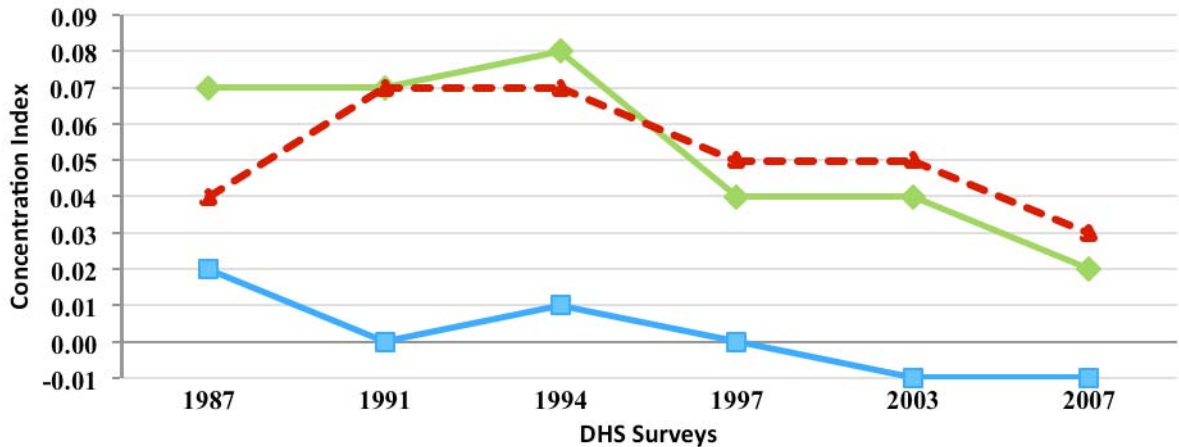

Actual

Need predicted

Need standardized

Supplement: MOESM6 [file 9550606]
